# Supplementary material
Source: MDPI journal article supplement (https://www.mdpi.com/2071-1050/11/1/48)
Supplement: s1 [file s1]

## Supplementary material

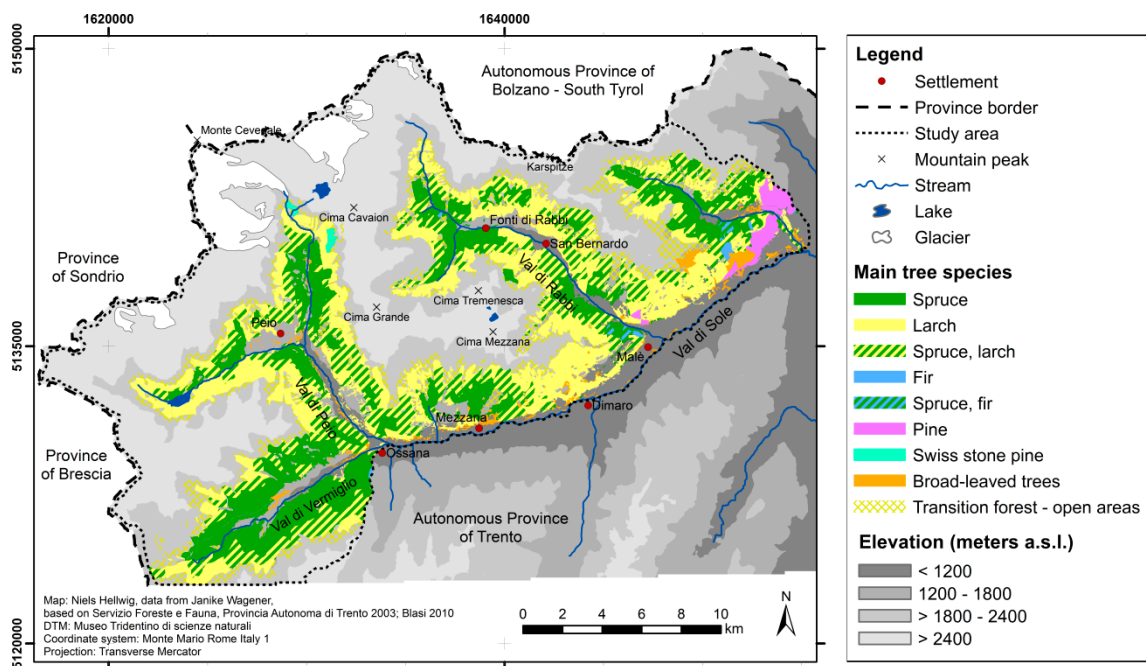

**Figure S1.** Distribution of forest tree species in the study area.

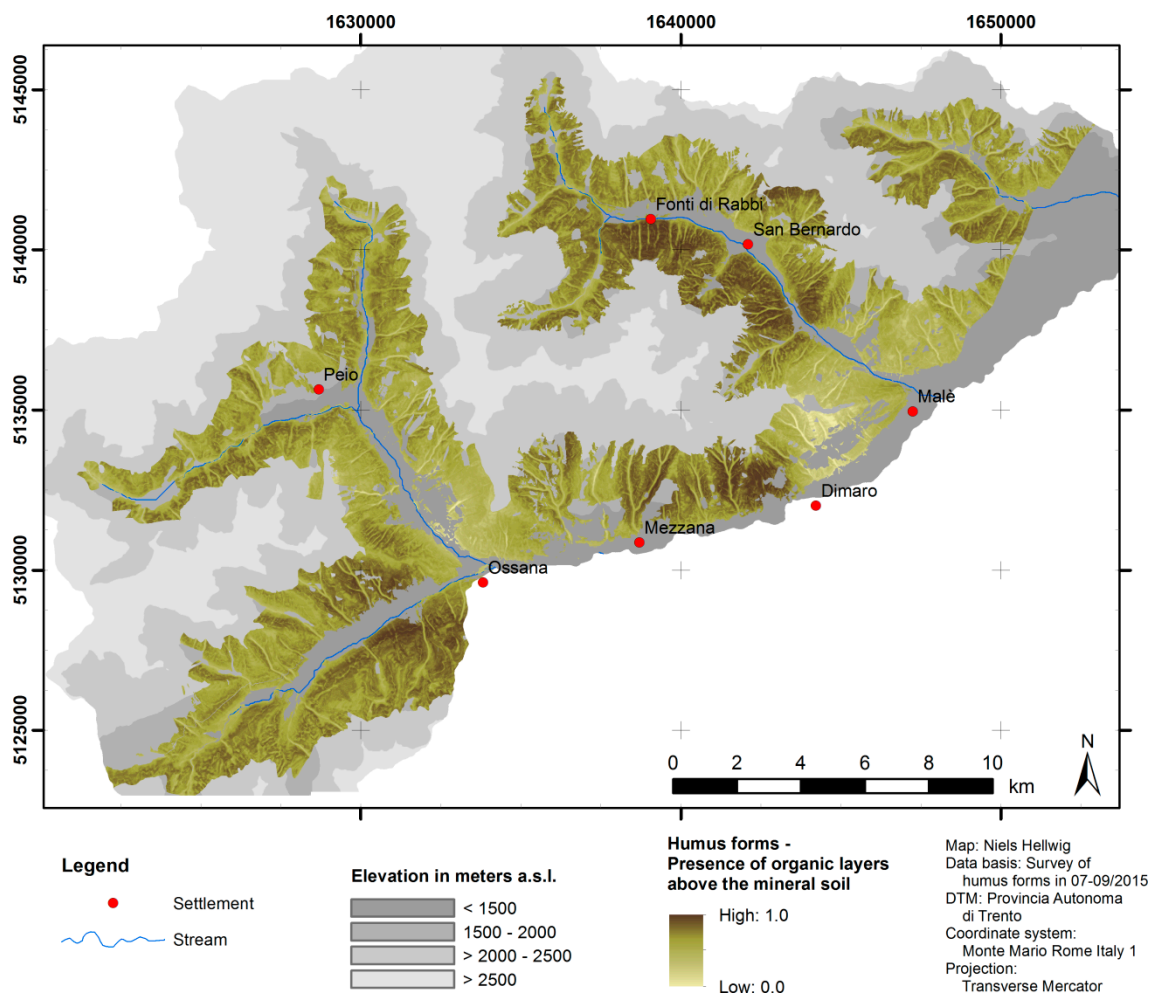

**Figure S2.** Predicted distribution of the presence of organic layers above the mineral soil at the landscape scale.

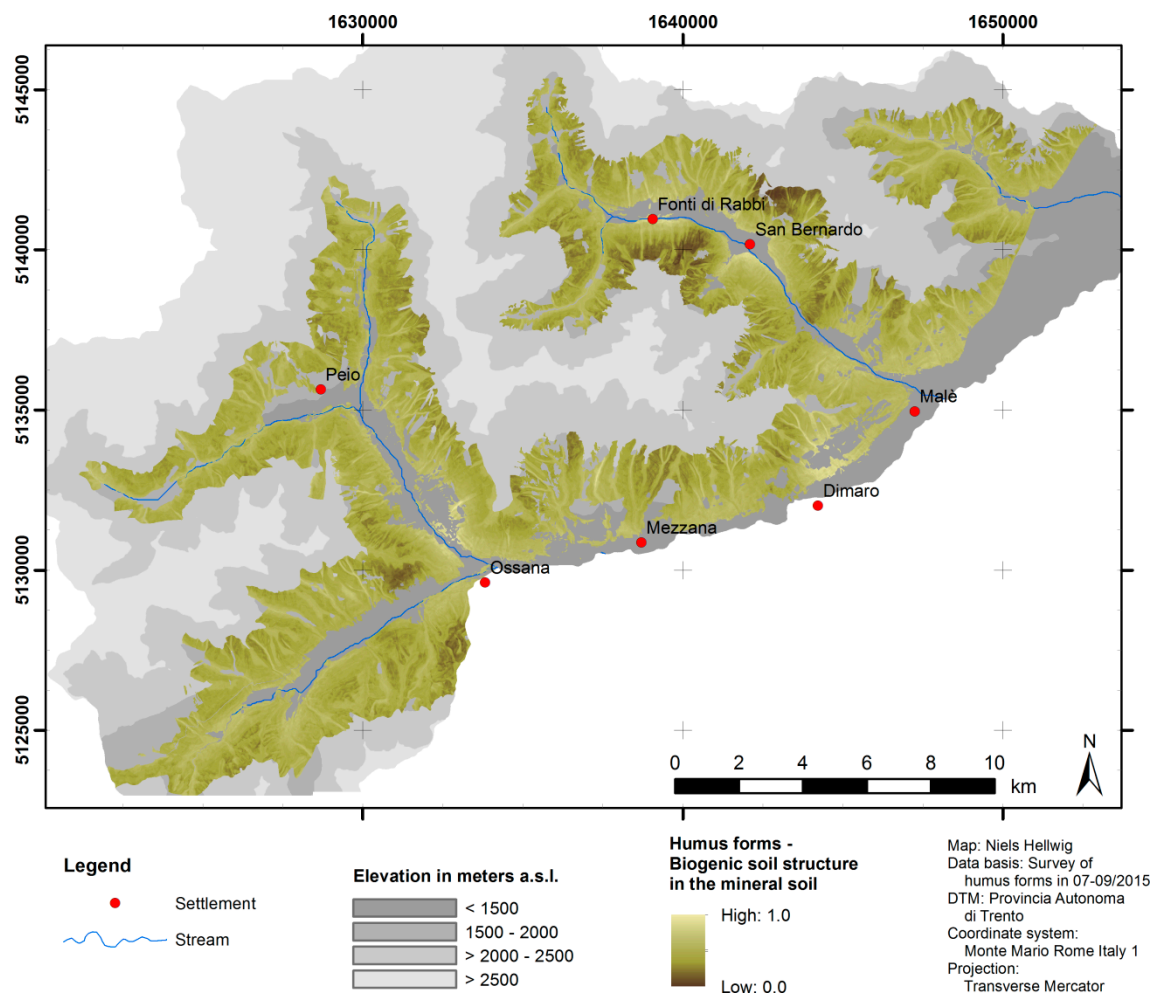

**Figure S3.** Predicted distribution of the biogenic soil structure in the mineral soil at the landscape scale.

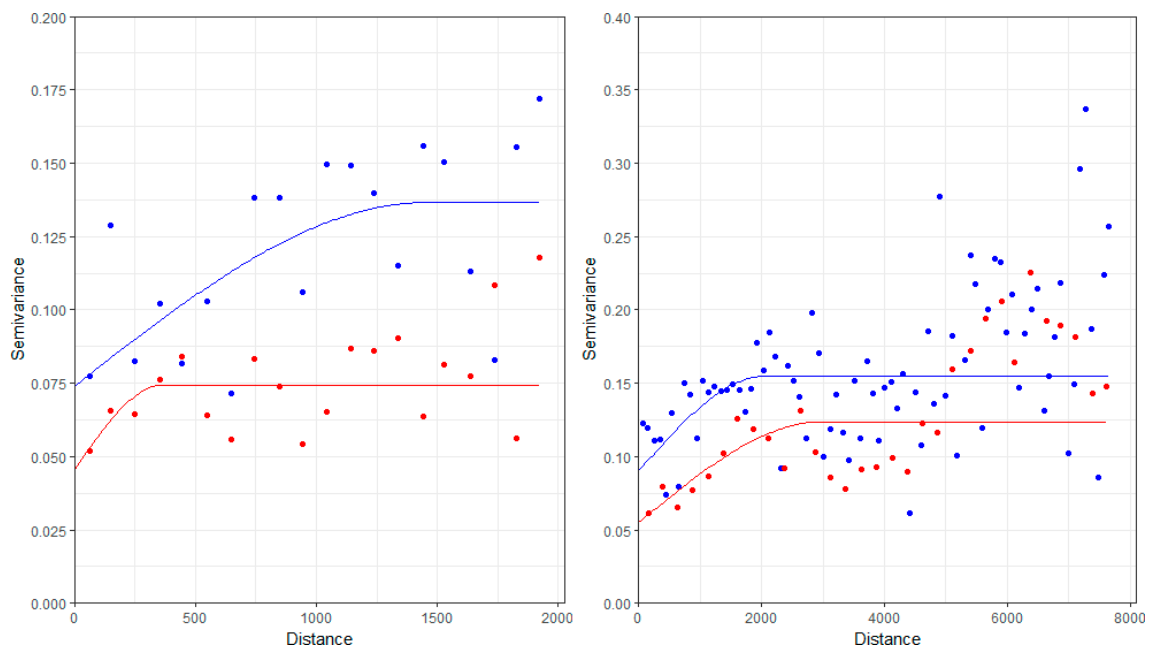

**Figure S4.** Variograms used for kriging of the model residuals from random forest at the slope scale (on the left) and at the landscape scale (on the right). Lines show the variogram fits of a spherical model. Red: Model of the presence of organic layers above the mineral soil. Blue: Model of the biogenic soil structure in the mineral soil.

**Table S1.** Humus forms (according to [34,35]) sampled at 30 sites within the study area (A1-A30)

| Site | Elevation<br>a.s.l. (m) | Ground cover<br>(percentage at site) | Dominant humus form classes<br>(according to [3]) |
|------|-------------------------|--------------------------------------|---------------------------------------------------|
| A1   | 933                     | Moss (80%)                           | Moder                                             |
|      |                         | Litter (20%)                         | Moder                                             |
| A2   | 1035                    | Litter (100%)                        | Mull                                              |
| A3   | 1044                    | Grass (100%)                         | Mull                                              |
| A4   | 1096                    | Litter (70%)                         | Moder                                             |
|      |                         | Grass (30%)                          | Moder                                             |
| A5   | 1179                    | Litter (70%)                         | Amphi                                             |
|      |                         | Grass (30%)                          | Amphi                                             |
| A6   | 1206                    | Litter (80%)                         | Moder                                             |
|      |                         | Grass (20%)                          | Mullmoder                                         |
| A7   | 1211                    | Grass (90%)                          | Mullmoder                                         |
|      |                         | Litter (10%)                         | Eroded Moder                                      |
| A8   | 1254                    | Litter (90%)                         | Mull                                              |
|      |                         | Grass (10%)                          | Mull                                              |
| A9   | 1310                    | Grass (80%)                          | Mull                                              |
|      |                         | Litter (20%)                         | Mull                                              |
| A10  | 1317                    | Grass (70%)                          | Mull                                              |
|      |                         | Litter (30%)                         | Moder                                             |
| A11  | 1385                    | Litter (60%)                         | Eroded Moder                                      |
|      |                         | Grass (40%)                          | Moder                                             |
| A12  | 1388                    | Litter (60%)                         | Amphi                                             |
|      |                         | Grass (40%)                          | Amphi                                             |
| A13  | 1407                    | Litter (50%)                         | Moder                                             |
|      |                         | Grass (30%)                          | Moder                                             |
|      |                         | Moss (20%)                           | Moder                                             |
| A14  | 1422                    | Litter (60%)                         | Mull                                              |
|      |                         | Grass (40%)                          | Mull                                              |
| A15  | 1462                    | Moss (60%)                           | Mullmoder                                         |
|      |                         | Litter (40%)                         | Moder                                             |
| A16  | 1492                    | Grass (60%)                          | Mullmoder                                         |
|      |                         | Litter (40%)                         | Moder                                             |
| A17  | 1508                    | Grass (100%)                         | Moder                                             |
| A18  | 1528                    | Litter (90%)                         | Moder                                             |
|      |                         | Grass (10%)                          | Amphi                                             |
| A19  | 1538                    | Grass (100%)                         | Mullmoder                                         |
| A20  | 1597                    | Grass (70%)                          | Mullmoder                                         |
|      |                         | Litter (30%)                         | Amphi                                             |
| A21  | 1610                    | Litter (80%)                         | Mullmoder                                         |
|      |                         | Grass (20%)                          | Mull                                              |
| A22  | 1630                    | Grass (50%)                          | Moder                                             |
|      |                         | Litter (50%)                         | Moder                                             |
| A23  | 1687                    | Litter (50%)                         | Moder                                             |
|      |                         | Grass (40%)                          | Mull                                              |
|      |                         | Moss (10%)                           | Amphi                                             |
| A24  | 1735                    | Grass (100%)                         | Mull                                              |
| A25  | 1777                    | Grass (100%)                         | Mull                                              |
| A26  | 1800                    | Litter (60%)                         | Amphi                                             |
|      |                         | Grass (40%)                          | Amphi                                             |
| A27  | 1807                    | Grass (70%)                          | Mullmoder                                         |
|      |                         | Litter (30%)                         | Moder                                             |
| A28  | 1833                    | Grass (90%)                          | Moder                                             |
|      |                         | Litter (10%)                         | Moder                                             |
| A29  | 1881                    | Grass (100%)                         | Moder                                             |
| A30  | 2046                    | Grass (70%)                          | Mull                                              |
|      |                         | Shrubs (20%)                         | Moder                                             |
|      |                         | Litter (10%)                         | Mull                                              |

**Table S2.** Humus form classes sampled at different ground cover types at the local scale (sites N1–N3 and S6–S8).

| Site | Sample label | Ground cover | Dominant humus form classes<br>(according to [3]) |
|------|--------------|--------------|---------------------------------------------------|
| N1   | N1F1         | Fern         | Amphi                                             |
|      | N1F2         | Fern         | Mull                                              |
|      | N1F3         | Fern         | Mull                                              |
|      | N1M1         | Moss         | Mull                                              |
|      | N1M2         | Moss         | Amphi                                             |
|      | N1M3         | Moss         | Mull                                              |
|      | N1vMa        | Moss         | Mullmoder                                         |
|      | N1vLa        | Litter       | Eroded Moder                                      |
|      | N1vLb        | Litter       | Moder                                             |
|      | N1vBa        | Branches     | Mullmoder                                         |
|      | N1vBb        | Branches     | Moder                                             |
|      | N1vBc        | Branches     | Moder                                             |
| N2   | N2M1         | Moss         | Moder                                             |
|      | N2M2         | Moss         | Moder                                             |
|      | N2M3         | Moss         | Moder                                             |
|      | N2vMa        | Moss         | Moder                                             |
|      | N2vLa        | Litter       | Moder                                             |
|      | N2vLb        | Litter       | Moder                                             |
|      | N2vBa        | Branches     | Moder                                             |
| N3   | N3G1         | Grass        | Moder                                             |
|      | N3G2         | Grass        | Moder                                             |
|      | N3G3         | Grass        | Moder                                             |
|      | N3vGa        | Grass        | Moder                                             |
|      | N3M1         | Moss         | Moder                                             |
|      | N3M2         | Moss         | Moder                                             |
|      | N3M3         | Moss         | Moder                                             |
|      | N3vLa        | Litter       | Moder                                             |
|      | N3vBa        | Branches     | Moder                                             |
| S6   | S6G1         | Grass        | Mull                                              |
|      | S6G2         | Grass        | Amphi                                             |
|      | S6G3         | Grass        | Amphi                                             |
|      | S6vGa        | Grass        | Amphi                                             |
|      | S6L1         | Litter       | Mull                                              |
|      | S6L2         | Litter       | Mull                                              |
|      | S6L3         | Litter       | Mull                                              |
|      | S6vLa        | Litter       | Amphi                                             |
|      | S6B3         | Branches     | Amphi                                             |
|      | S6vBa        | Branches     | Mullmoder                                         |
| S7   | S7G1         | Grass        | Moder                                             |
|      | S7G2         | Grass        | Amphi                                             |
|      | S7G3         | Grass        | Amphi                                             |
|      | S7vGa        | Grass        | Mullmoder                                         |
|      | S7vGb        | Grass        | Mullmoder                                         |
|      | S7vLa        | Litter       | Amphi                                             |
|      | S7vLb        | Litter       | Mull                                              |
|      | S7vLc        | Litter       | Mullmoder                                         |
| S8   | S8G1         | Grass/Moss   | Moder                                             |
|      | S8G2         | Grass/Moss   | Mullmoder                                         |
|      | S8G3         | Grass/Moss   | Eroded Moder                                      |
|      | S8vGa        | Grass/Moss   | Moder                                             |
|      | S8vGb        | Grass/Moss   | Moder                                             |
|      | S8L1         | Litter       | Moder                                             |
|      | S8L2         | Litter       | Mullmoder                                         |
|      | S8L3         | Litter       | Mullmoder                                         |
|      | S8vLa        | Litter       | Eroded Moder                                      |
|      | S8vLb        | Litter       | Mullmoder                                         |
|      | S8vBa        | Branches     | Moder                                             |

**Table S3.** Predicted areas covered by humus form classes as derived from spatial models at the slope and landscape scale (in ha). Percentage values are given in brackets

| Humus form class        | Slope scale, north-facing slope | Slope scale, south-facing slope | Landscape scale  |
|-------------------------|---------------------------------|---------------------------------|------------------|
| Moder                   | 90.23 (24.8%)                   | 141.96 (62.9%)                  | 730.59 (4.0%)    |
| Moder, partially eroded | 9.64 (2.7%)                     | 4.81 (2.1%)                     | 117.45 (0.6%)    |
| Moder, trend to Amphi   | 99.73 (27.5%)                   | 63.60 (28.2%)                   | 4689.93 (25.8%)  |
| Mullmoder               | 116.66 (32.1%)                  | 11.17 (4.9%)                    | 12252.00 (67.4%) |
| Mullmoder, eroded       | 2.66 (0.7%)                     | < 0.01 (< 0.1%)                 | 160.56 (0.9%)    |
| Amphi                   | 17.70 (4.9%)                    | 3.99 (1.8%)                     | 23.43 (0.1%)     |
| Mull, trend to Amphi    | 20.61 (5.7%)                    | 0.31 (0.1%)                     | 96.97 (0.5%)     |
| Mull                    | 6.05 (1.7%)                     | -                               | 101.57 (0.6%)    |
| Total area              | 363.28                          | 225.84                          | 18172.50         |
